# Supplementary material for: Automatic classification of signal regions in 1H Nuclear Magnetic Resonance spectra
Source: Frontiers journal article supplement (doi:10.3389/frai.2022.1116416), 2023-01-11
Supplement: Data_Sheet_1.PDF [file Data_Sheet_1.PDF]

# Supplementary Material

## 1 SYNTHETIC SPECTRA GENERATION

### Phase and baseline distortions

We added a frequency dependent phase distortion  $\Delta\phi = \phi_0 + \phi_1 \omega$ , where  $|\phi_0| \leq 6 \text{ rad}$  and  $|\phi_1| \leq 3.9 \text{ rad}$ .

To add a baseline distortion, we defined two parameters,  $b_l$  and  $b_r$ , with a modulus lower than two times the noise level. The baseline distortion is defined as  $\Delta b = b_r x + b_l (1 - x)$ , where  $x$  is a linear function increasing monotonically from 0, at the left border of the spectrum, to 1 at the right border of the spectrum.

**Table S1.** *Parameters ranges.* In the table are reported the range of values for the parameters of the multiplets included in the synthetic spectra.

| Parameter           | Ranges                       |
|---------------------|------------------------------|
| $\gamma$            | 0.5-7 Hz                     |
| $\frac{J}{2\gamma}$ | 0.5-18                       |
| $\phi_0$            | -6-6                         |
| $\phi_1$            | -3.9-3.9                     |
| $b_l$               | -2 noise level-2 noise level |
| $b_r$               | -2 noise level-2 noise level |

## 2 NETWORK ARCHITECTURE

**Table S2.** *Network architecture.* In the table are reported the output dimension for each layer, where *None* is the batch size,  $S_I$  is the size of the input, that is the number of spectral points, and the third component is the channel size.

| Layer                            | Output              |
|----------------------------------|---------------------|
| Inception-like module            | (None, $S_I$ , 64)  |
| Time-distributed fully connected | (None, $S_I$ , 64)  |
| Bi-directional LSTM              | (None, $S_I$ , 512) |
| Time-distributed fully connected | (None, $S_I$ , 512) |
| Time-distributed fully connected | (None, $S_I$ , 512) |
| Time-distributed fully connected | (None, $S_I$ , 64)  |
| Time-distributed fully connected | (None, $S_I$ , 8)   |
| Softmax output                   | (None, $S_I$ , 8)   |

### 3 EXPERIMENTAL TEST SET

**Table S3.** *Experimental test set.* In the table are reported the details of the 10 experimental spectra used to evaluate the model. In the sixth column we listed the number of resonances belonging to the classes of multiplets represented in the training set of the model.

| Compound      | Solvent           | Base frequency (MHz) | Points | PPM range   | Multiplets                                                     |
|---------------|-------------------|----------------------|--------|-------------|----------------------------------------------------------------|
| Quinine       | Acetone           | 400                  | 65536  | −3.84-16.19 | 1 singlet<br>3 doublets<br>1 triplet                           |
| Eburnamonina  | CDCl <sub>3</sub> | 500                  | 65536  | −1.50-14.50 | 4 singlets<br>2 triplets                                       |
| Geraniol      | CDCl <sub>3</sub> | 400                  | 32768  | −4.10-16.45 | 1 singlet                                                      |
| Camphor       | CDCl <sub>3</sub> | 400                  | 32768  | −4.10-16.45 | 7 singlets<br>1 triplet<br>1 quartet                           |
| 3-Ethyltoluol | DMSO              | 400                  | 32768  | −4.10-16.45 | 2 triplets<br>1 quartet                                        |
| Cumol         | DMSO              | 400                  | 32768  | −4.10-16.45 | 2 singlets<br>1 doublet<br>1 septet                            |
| L-lactic acid | DMSO              | 400                  | 32768  | −4.10-16.45 | 3 doublets<br>2 quartets                                       |
| Naringenin    | DMSO              | 400                  | 32768  | −4.10-16.45 | 3 singlets                                                     |
| Cinchocaine   | DMSO              | 600                  | 32768  | −4.19-16.44 | 2 doublets<br>7 triplets<br>1 quartet<br>1 quintet<br>1 sextet |
| Quinine       | MeOD              | 400                  | 32768  | −4.10-16.45 | 2 singlets<br>4 doublets<br>5 triplets<br>1 quintet            |
